# Supplementary material for: Do liberal thresholds for red cell transfusion result in improved quality of life for patients undergoing intensive chemotherapy for acute myeloid leukemia? A randomized crossover feasibility study
Source: PubMed Central journal article supplement — Haematologica. 2022 Feb 24;107(6):1474–8. doi: 10.3324/haematol.2021.279867 (PMC9152957; doi:10.3324/haematol.2021.279867), 2022-02-24
Supplement: 2021_279867_MORTON_SUPPL.pdf [file 2021_279867_MORTON_SUPPL.pdf]

# Do liberal thresholds for red cell transfusion result in improved quality of life for patients undergoing intensive chemotherapy for acute myeloid leukemia? A randomized crossover feasibility study

Suzy Morton,<sup>1,2</sup> Mallika Sekhar,<sup>3,4</sup> Heather Smethurst,<sup>5</sup> Ana Mora,<sup>5</sup> Renate L. Hodge,<sup>5</sup> Cara L. Hudson,<sup>6</sup> Joseph Parsons,<sup>6</sup> Valerie Hopkins<sup>5</sup> and Simon J. Stanworth<sup>7,8,9</sup>

<sup>1</sup>Department of Clinical Hematology, University Hospitals Birmingham NHS Foundation Trust, Birmingham; <sup>2</sup>Medical Department, NHS Blood and Transplant, Birmingham; <sup>3</sup>Department of Hematology, University College London Hospitals NHS Foundation Trust, London; <sup>4</sup>Royal Free London NHS Foundation Trust, Department of Hematology, London; <sup>5</sup>Clinical Trials Unit, NHS Blood and Transplant, Cambridge; <sup>6</sup>Clinical Trials Unit, NHS Blood and Transplant, Bristol; <sup>7</sup>Department of Clinical Hematology, Oxford University Hospitals NHS Foundation Trust, Oxford; <sup>8</sup>Clinical Department, NHS Blood and Transplant, Oxford and <sup>9</sup>Radcliffe Department of Medicine, University of Oxford, and NIHR Oxford Biomedical Research Center, Oxford, UK

Correspondence:

SUZY MORTON - [suzy.morton@nhsbt.nhs.uk](mailto:suzy.morton@nhsbt.nhs.uk)

<https://doi.org/10.3324/haematol.2021.279867>

Supplementary information

Supplementary Figure 1: CONSORT diagram

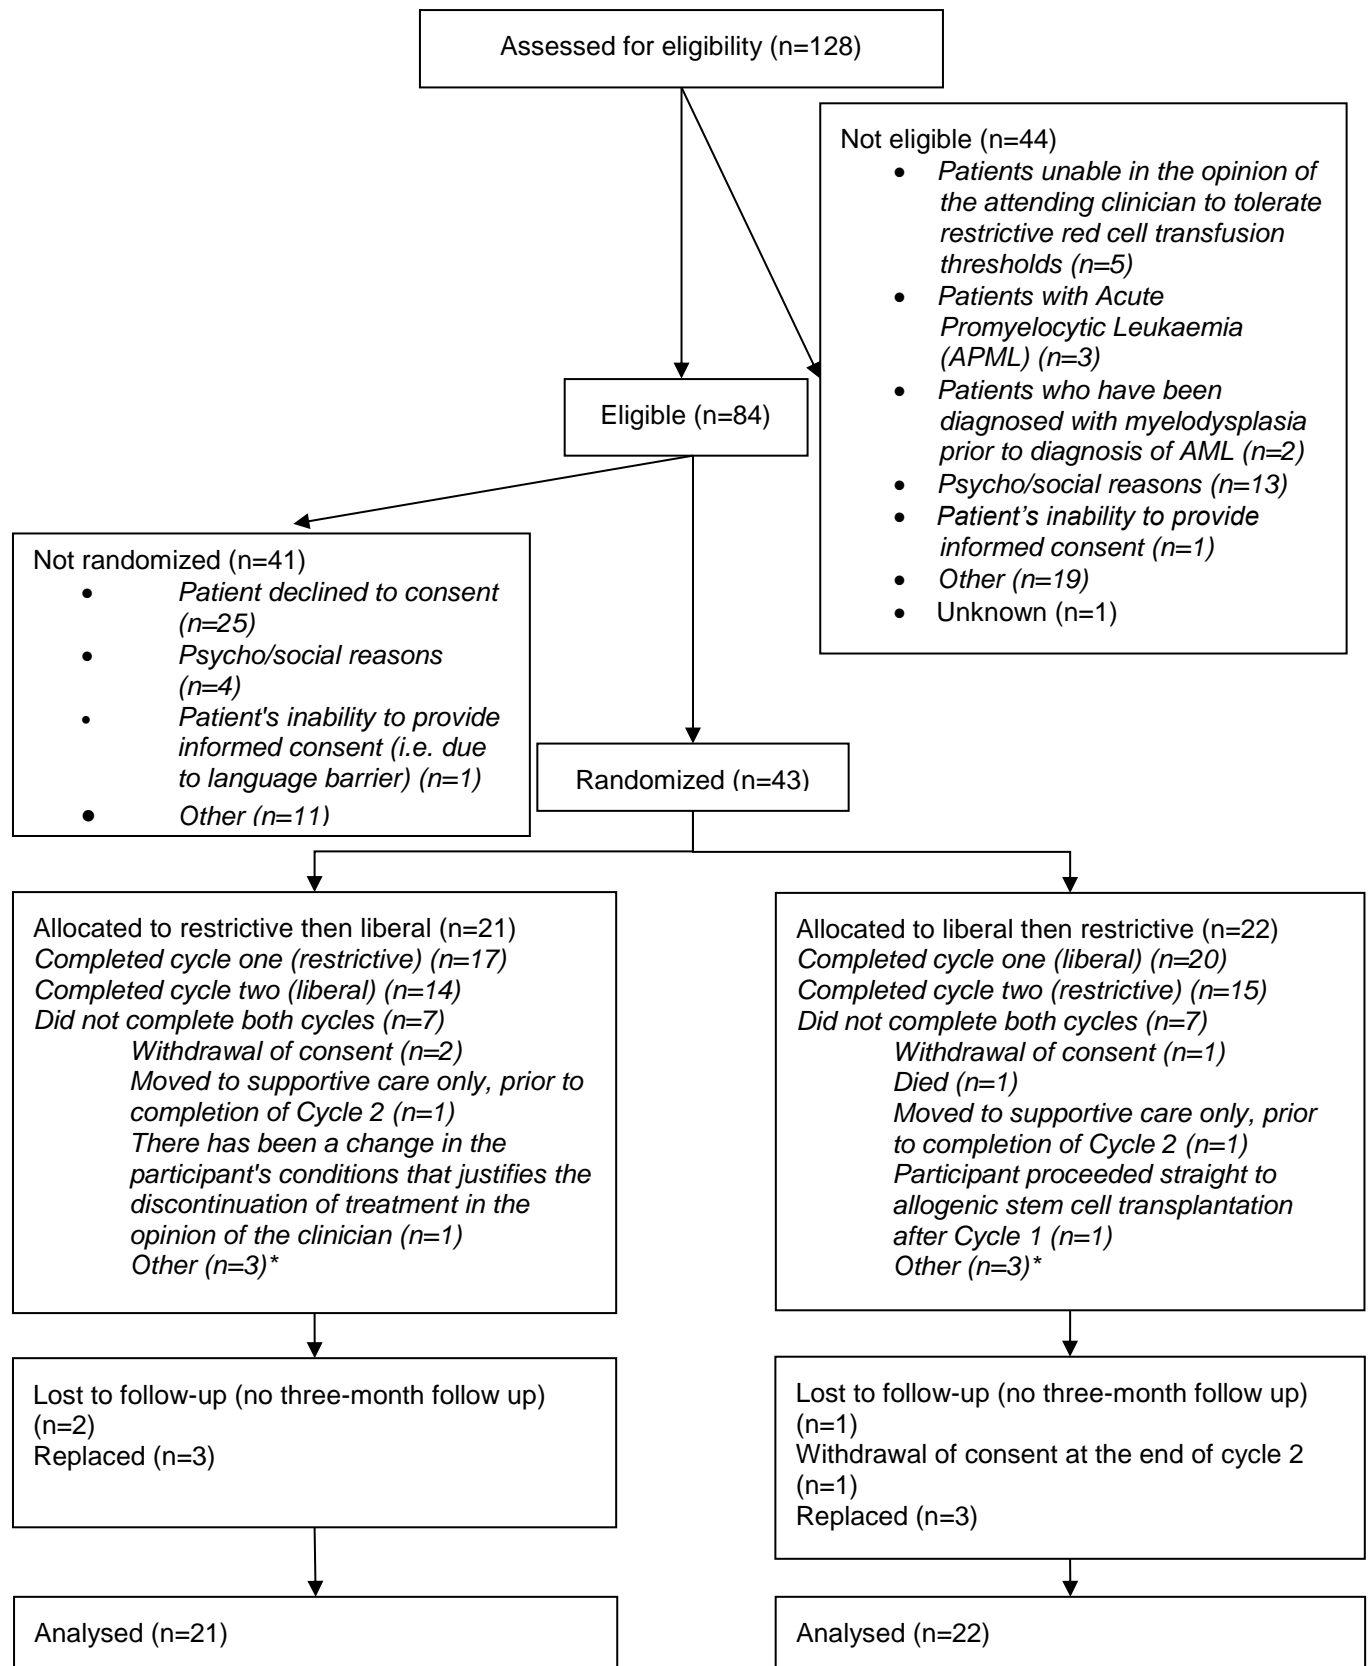

\* Intermittent withdrawal of consent (2 in 'Restrictive then Liberal' and 1 in 'Liberal then Restrictive')

**Supplementary Figure 2: Quality of life score by time period and policy**

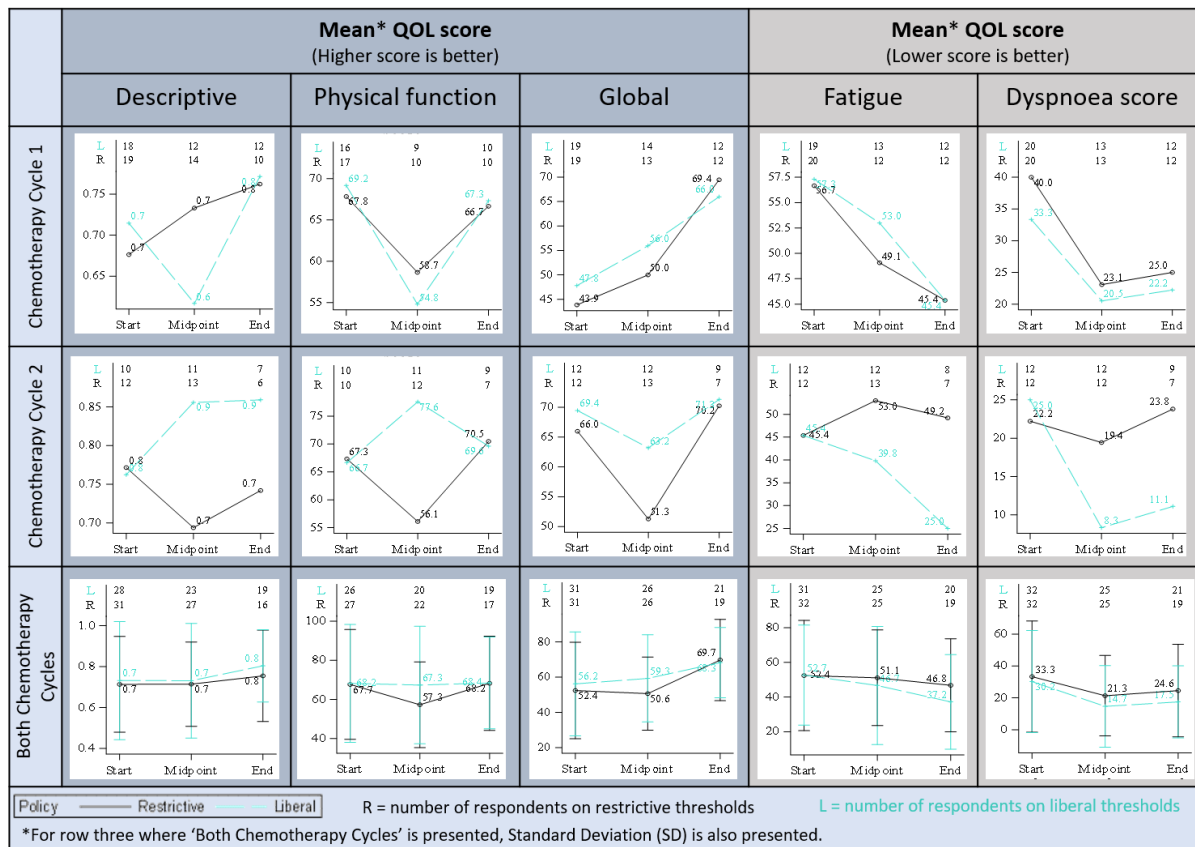

**Supplementary Table 1: Discontinuation of trial treatment**

| Centre number                                                                                       | Arm | Stage of withdrawal                        | Reason given                                                                                                                                                                                                   | Further information                                                                                                                        | Withdrew consent for data collection |
|-----------------------------------------------------------------------------------------------------|-----|--------------------------------------------|----------------------------------------------------------------------------------------------------------------------------------------------------------------------------------------------------------------|--------------------------------------------------------------------------------------------------------------------------------------------|--------------------------------------|
| 1                                                                                                   | L/R | After Cycle 1 (did not proceed to cycle 2) | Participant given poor prognosis<br>Felt they were allocated to restrictive arm                                                                                                                                | Participant was allocated to liberal strategy for cycle 1                                                                                  | Yes                                  |
| 1                                                                                                   | R/L | Cycle 1 Day 16                             | Participant had too much to think about                                                                                                                                                                        |                                                                                                                                            | Yes                                  |
| 3                                                                                                   | R/L | After Cycle 1 (did not proceed to cycle 2) | Participant felt they were allocated to restrictive threshold and that was too low                                                                                                                             |                                                                                                                                            | No                                   |
| 3                                                                                                   | L/R | Cycle 2 Day 30 (Last day)                  | Participant felt they were allocated to restrictive threshold and that they were excessively tired due to that                                                                                                 |                                                                                                                                            | No                                   |
| <b>Additionally, the following participants agreed to restart the trial on the subsequent cycle</b> |     |                                            |                                                                                                                                                                                                                |                                                                                                                                            |                                      |
| 2                                                                                                   | R/L | Cycle 1 Day 20                             | Participant felt very unwell                                                                                                                                                                                   | Participant re-consented to continue for Cycle 2.                                                                                          | No                                   |
| 2                                                                                                   | R/L | Cycle 1 Day 7                              | Hemoglobin dropped to 50 g/L and Participant felt this would not have happened off trial<br>Participant did not feel 90 g/L was appropriate for second cycle either<br>Participant did not feel QoL was robust | Participant withdrew consent after Cycle 1 but re-consented to cycle 2.                                                                    | No                                   |
| 2                                                                                                   | L/R | Between Cycle 1 & Cycle 2                  | Participant did not feel they could tolerate lower threshold for cycle 2                                                                                                                                       | Participant withdrew consent after first chemotherapy cycle as felt unwell. Later re-consented to continue with second chemotherapy cycle. | No                                   |

L= Liberal cycle; R= Restrictive cycle
